# Supplementary material
Source: MDPI journal article supplement (https://www.mdpi.com/2073-4395/8/9/184)
Supplement: s1 [file s1]

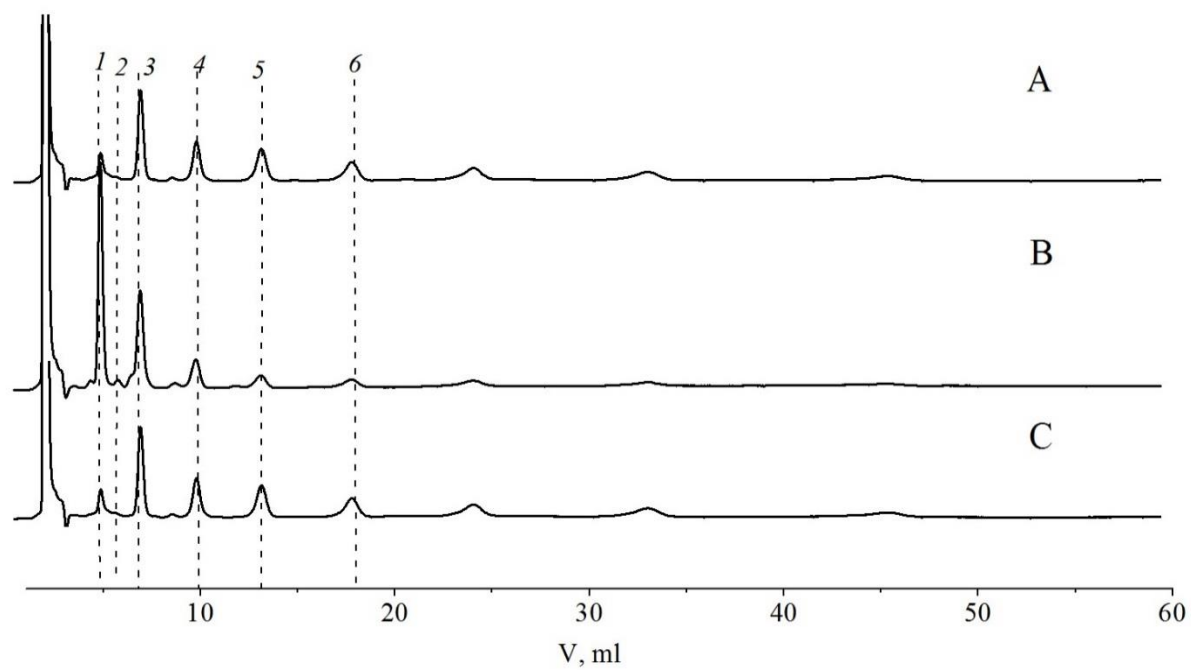

Fig. S1. HPLC analysis of Albik tubers carbohydrates at the end of April (A), May (B) and July (C); peaks 1, 2, 3, 4, 5 and 6 correspond to fructose, glucose, sucrose, kestose, nystose and GF<sub>4</sub>, respectively

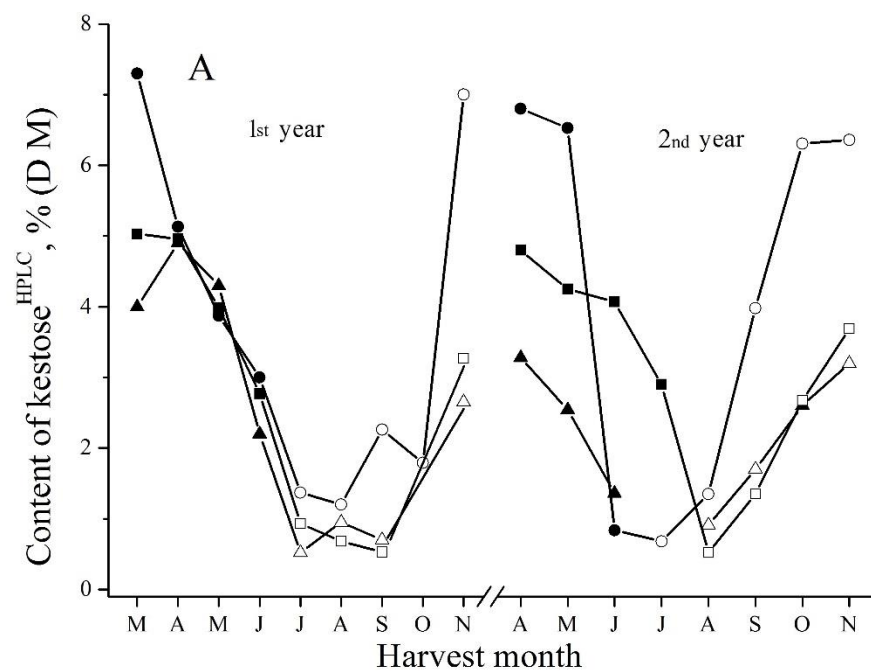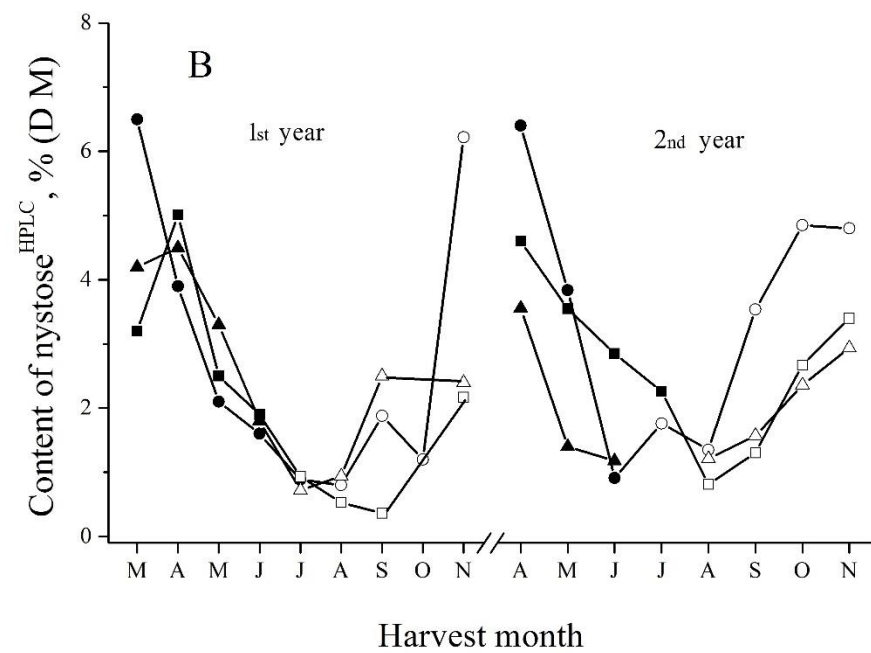

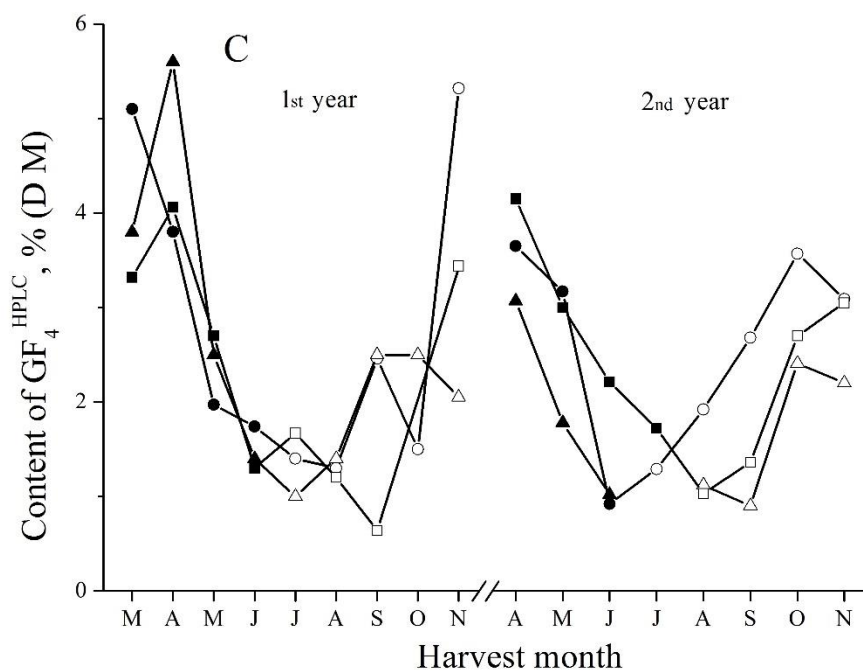

Fig. S2. Seasonal fluctuations of kestose (A), nystose (B) and GF<sub>4</sub> (C) in the tubers of Sauliai (●, ○), Albik (▲, Δ) and Rubik (■, □); spring tubers: ●, ▲, ■; summer and autumn tubers: ○, Δ, □.

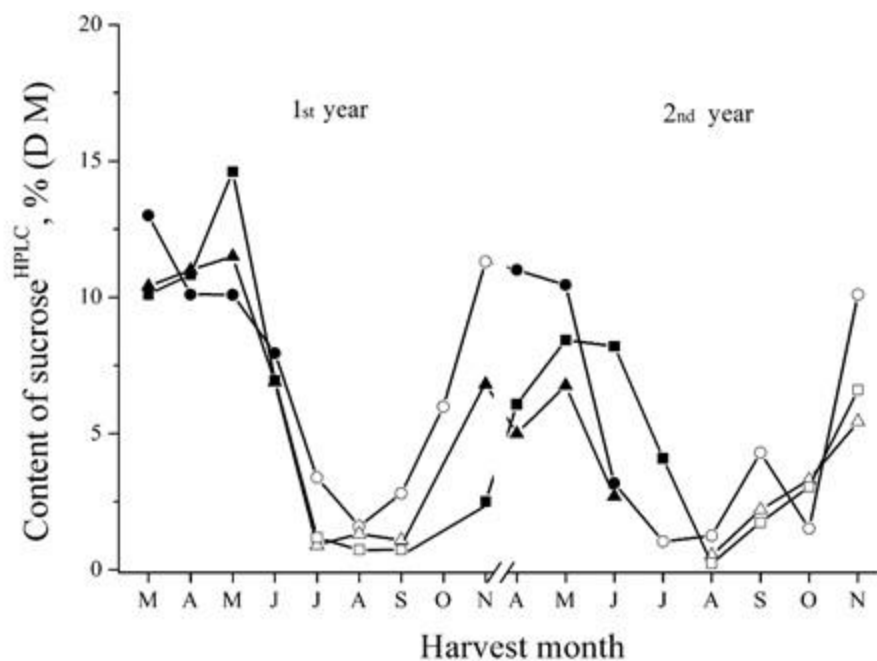

Fig. S3. Seasonal fluctuations of sucrose determined by HPLC method in the tubers of Sauliai (●, ○), Albik (▲, Δ) and Rubik (■, □); spring tubers: ●, ▲, ■; summer and autumn tubers: ○, Δ, □.

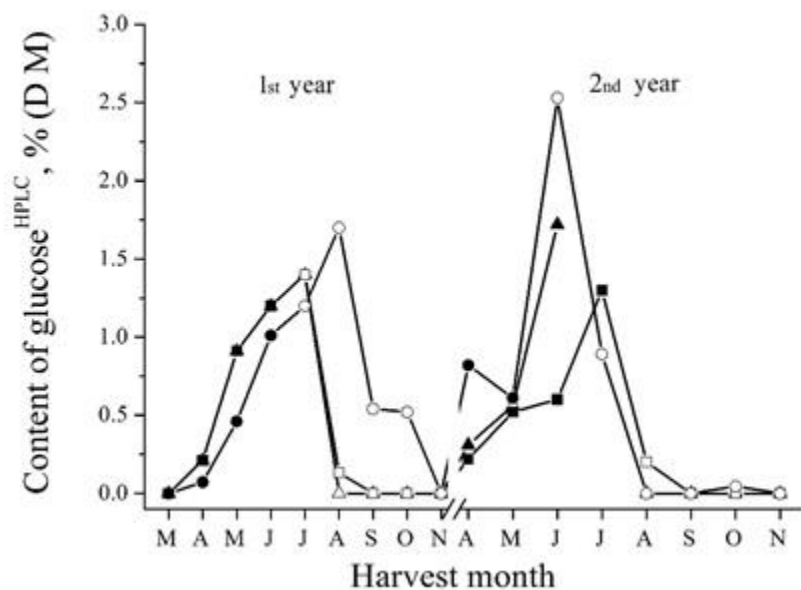

Fig. S4. Seasonal fluctuations of glucose determined by HPLC method in the tubers of Sauliai (●, ○), Albik (▲, Δ) and Rubik (■, □); spring tubers: ●, ▲, ■; summer and autumn tubers: ○, Δ, □.

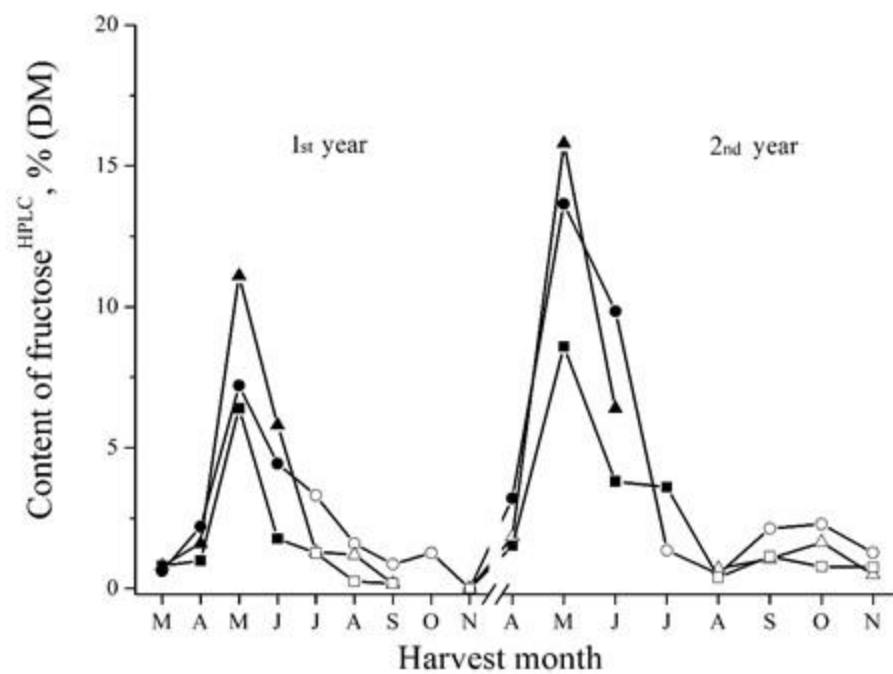

Fig. S5. Seasonal fluctuations of fructose determined by HPLC method in the tubers of Sauliai (●, ○), Albik (▲, △) and Rubik (■, □); spring tubers: ●, ▲, ■; summer and autumn tubers: ○, △, □.
